# Supplementary material
Source: MDPI journal article supplement (https://www.mdpi.com/2076-3417/10/9/3107)
Supplement: s1 [file s1]

**Table S1. Excluded articles with reason for exclusion.**

| <i>Reason for exclusion</i>                              | <i>Excluded articles</i> |
|----------------------------------------------------------|--------------------------|
| Methodology not compatible with the subject of the study | 831                      |
| Expert opinions                                          | 36                       |
| Editorial articles                                       | 51                       |
| Replies to authors or editor                             | 38                       |
| Interviews                                               | 9                        |
| Commentaries                                             | 49                       |
| Books, conference abstracts or thesis                    | 86                       |
| Summaries                                                | 14                       |
| Survey articles                                          | 9                        |
| Retrospective clinical trials                            | 427                      |
| Narrative reviews                                        | 32                       |
| Systematic reviews                                       | 12                       |
| Meta-analyses                                            | 11                       |
| Animal studies                                           | 22                       |
| In-vitro or in-silico studies                            | 45                       |
| Studies on molecular biology, histology or genetics      | 36                       |
| Absence of control group                                 | 346                      |
| Same sample of an already included study                 | 37                       |
| Different outcomes evaluated                             | 597                      |
| <b>Total</b>                                             | <b>2688</b>              |

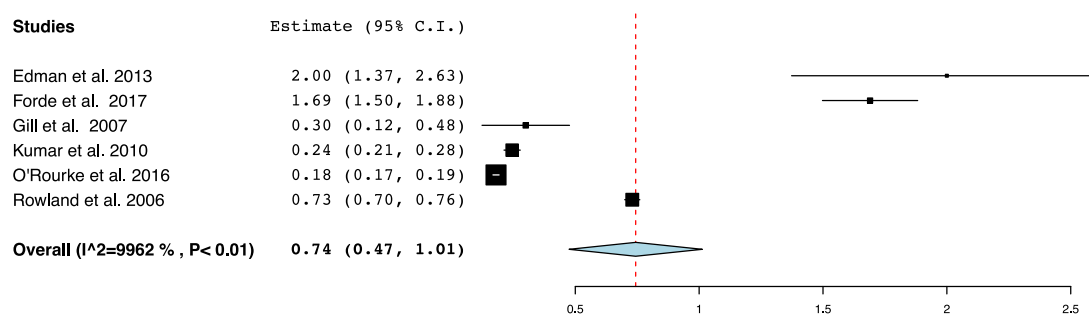

**Figure S1. Sensitivity analysis.**
